# Supplementary material
Source: PubMed Central journal article supplement (PMC9022358)
Supplement: NIHMS1782970-supplement-1.pdf [file NIHMS1782970-supplement-1.pdf]

## SUPPLEMENTARY FIGURES

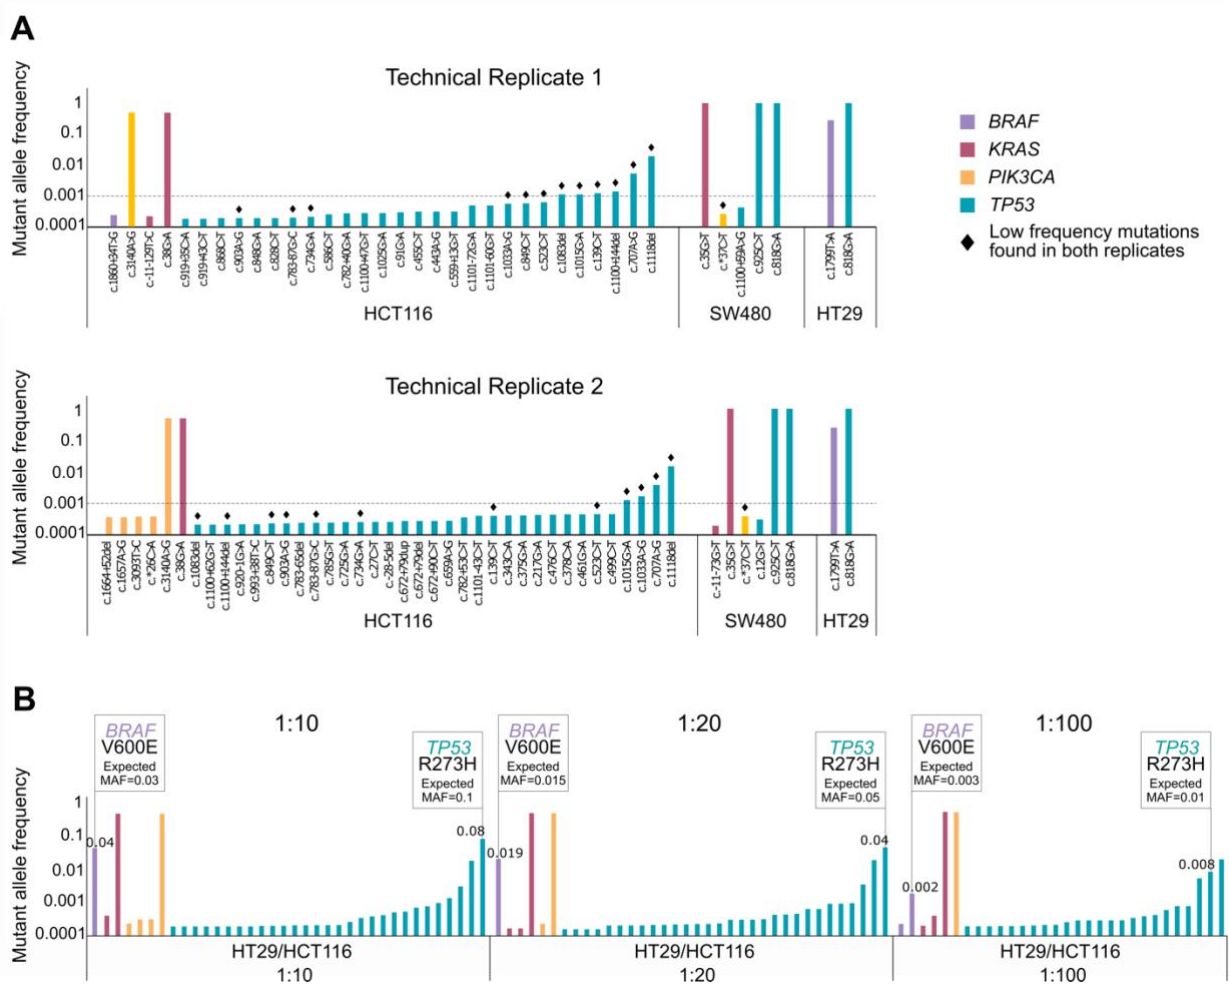

**Figure S1. Ultra-deep sequencing of colorectal cancer cell lines with CRISPR-DS. A.** Distribution of mutations in two technical replicates of HCT116, SW480 and HT29 cell lines. Each bar represents a mutation, color coded by gene. The height of the bars indicates Mutant Allele Frequency (MAF), calculated as the number of mutant alleles divided by the sequencing depth at a given position. Mutations are sorted by ascending MAF within each gene for each sample. Mutations found in both replicates are highlighted with a black diamond. **B.** Spike in of HT29 in HCT116 at different concentrations: 1/10, 1/20 and 1/100. Expected HT29 mutations and their MAF for each dilution are indicated with boxes and the observed frequency is indicated above each of the corresponding bars.

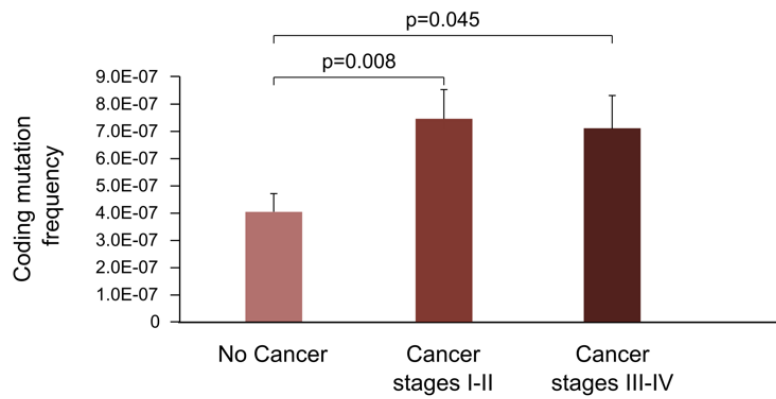

**Figure S2. Normal colon from individuals with CRC carries higher coding mutation frequency than individuals without cancer regardless of the cancer being early or late stage.** Coding mutation frequency is calculated as the number of mutations divided by the total number of duplex nucleotides sequenced in the coding target regions. P-values correspond to Mann-Whitney U test. Error bars represent standard error of the mean.

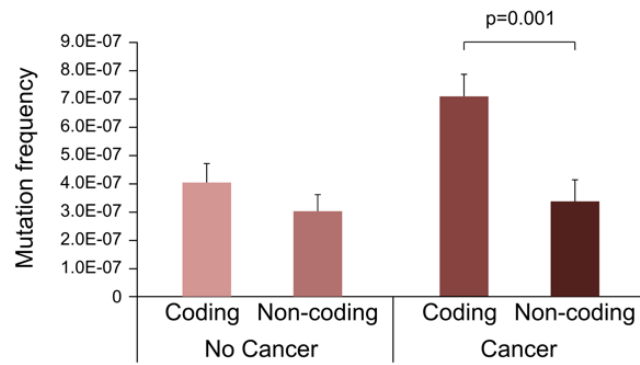

**Figure S3. Coding mutation frequency is higher than non-coding mutation frequency in normal colon of individuals with CRC.** Coding and non-coding mutation frequencies are calculated as the number of mutations divided by the total number of duplex nucleotides sequenced in the coding and non-coding target regions, respectively. P-value corresponds to Mann-Whitney U test. Error bars represent standard error of the mean.

### Normal colon of individuals without cancer

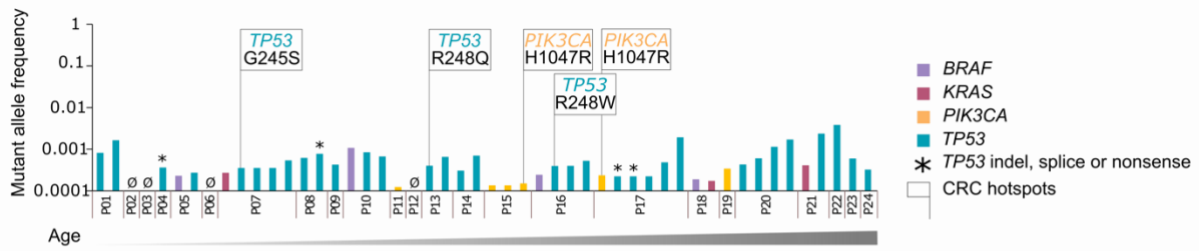

### Normal colon of individuals with cancer

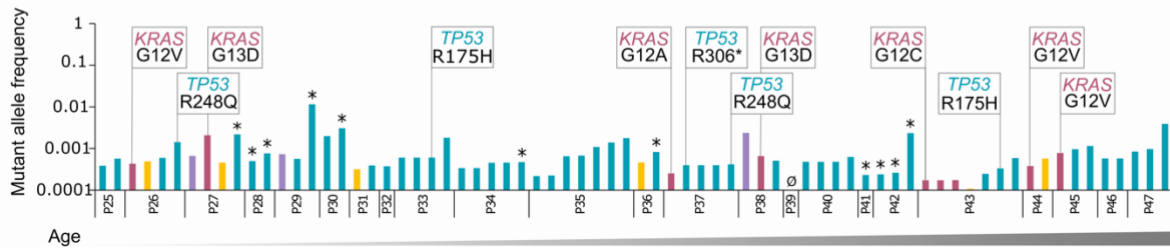

**Figure S4. Normal colon from individuals with and without CRC carries mutations in common cancer genes.** Distribution of mutations in normal colon from individuals without CRC (top) and individuals with CRC (bottom). Patients are sorted by ascending age and patient IDs are indicated in the x-axis. Each bar represents a mutation, color coded by gene. The height of the bars indicates Mutant Allele Frequency (MAF), calculated as the number of mutant alleles divided by the sequencing depth at a given position. Mutations are sorted by ascending MAF within each gene for each patient. Hotspot mutations are indicated with boxes and *TP53* indels, nonsense, and splice mutations are indicated with asterisks.

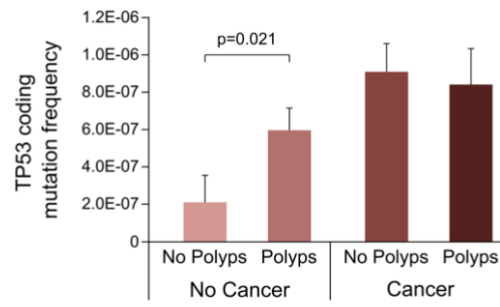

**Figure S5. *TP53* coding mutations are more frequent in normal colon from individuals without CRC that have a history of polyp formation.** Comparison of *TP53* mutation frequency in the normal colon of polyp and non-polyp formers with and without CRC. P-value corresponds to Mann-Whitney U test. Error bars represent standard error of the mean.
